# Supplementary material for: Screening of Leafy Vegetable Varieties with Low Lead and Cadmium Accumulation Based on Foliar Uptake
Source: MDPI journal article supplement (doi:10.3390/life12030339), 2022-02-24
Supplement: s1 [file s1]

## Cover sheet for Supplementary Material for Publication

Zhangqian Xu<sup>a</sup>, Jianwei Peng<sup>a</sup>, Zhen Zhu<sup>a</sup>, Pengyue Yu<sup>a</sup>, Maodi Wang<sup>a</sup>, Zhi Huang<sup>a</sup>,  
Ying Huang<sup>a, b\*</sup>, Zhaojun Li<sup>b</sup>

<sup>a</sup> National Engineering Research Center for Efficient Utilization of Soil and Fertilizer Resources, College of Resources and Environment, Hunan Agricultural University, Hunan, 410128, China

<sup>b</sup> Institute of Agricultural Resources and Regional Planning, Chinese Academy of Agricultural Sciences, Key Laboratory of Plant Nutrition and Fertilizer, Ministry of Agriculture, Beijing 100081, PR China

Manuscript title: Varieties screening of leafy vegetables with low accumulation of lead and cadmium based on foliar uptake

Number of pages: 3

Number of tables: 2

### **Table of contents**

**Table S1.** The stomatal width-to-length ratio of 20 vegetables.

**Table S2.** The Leaf surface area of 20 vegetables.

**Table S1.** The stomatal width-to-length ratio of 20 vegetables.

| Specie                                             | Abbreviation  | width-to-length ratio |
|----------------------------------------------------|---------------|-----------------------|
| Water spinach<br>( <i>Ipomoea aquatica</i> Forssk) | BGLYKXC (A1)  | 0.63±0.06             |
|                                                    | TGKXC (A2)    | 0.54±0.05             |
|                                                    | DYKXC (A3)    | 0.65±0.13             |
| Amaranth<br>( <i>Amaranthus tricolor</i> )         | YDHXC (B1)    | 0.35±0.04             |
|                                                    | QXC (B2)      | 0.33±0.21             |
|                                                    | HLYXC (B3)    | 0.33±0.15             |
|                                                    | QLYXC (B4)    | 0.31±0.08             |
|                                                    | BYYXC (B5)    | 0.12±0.03             |
| Cabbage<br>( <i>Brassica pekinensis</i> )          | SYKC-38 (C1)  | 0.42±0.07             |
|                                                    | XZJKC-50 (C2) | 0.47±0.18             |
|                                                    | MWTKC (C3)    | 0.43±0.10             |
|                                                    | NJGB (C4)     | 0.39±0.05             |
|                                                    | XRKC-536 (C5) | 0.45±0.12             |
|                                                    | JMC (C6)      | 0.55±0.16             |
|                                                    | SZQ (C7)      | 0.49±0.12             |
|                                                    | JDSJQ (C8)    | 0.5±0.12              |
|                                                    | BXGZ (C9)     | 0.48±0.07             |
|                                                    | ZSTCQ (C10)   | 0.44±0.23             |
|                                                    | CTQGC (C11)   | 0.39±0.11             |
|                                                    | SJXBC (C12)   | 0.43±0.03             |

**Table S2.** The Leaf surface area of 20 vegetables.

| Specie                                             | Abbreviation  | Leaf surface area<br>(cm <sup>2</sup> ) |
|----------------------------------------------------|---------------|-----------------------------------------|
| Water spinach<br>( <i>Ipomoea aquatica</i> Forssk) | BGLYKXC (A1)  | 501.2±0.25                              |
|                                                    | TGKXC (A2)    | 474.19±0.15                             |
|                                                    | DYKXC (A3)    | 406.03±0.18                             |
| Amaranth<br>( <i>Amaranthus tricolor</i> )         | YDHXC (B1)    | 108.48±0.15                             |
|                                                    | QXC (B2)      | 201.63±0.09                             |
|                                                    | HLYXC (B3)    | 321.65±0.21                             |
|                                                    | QLYXC (B4)    | 289.49±0.18                             |
|                                                    | BYYXC (B5)    | 112.64±0.08                             |
| Cabbage<br>( <i>Brassica pekinensis</i> )          | SYKC-38 (C1)  | 453.82±0.15                             |
|                                                    | XZJKC-50 (C2) | 283.27±0.09                             |
|                                                    | MWTKC (C3)    | 1064.45±0.31                            |
|                                                    | NJJGB (C4)    | 104.24±0.09                             |
|                                                    | XRKC-536 (C5) | 447.13±0.12                             |
|                                                    | JMC (C6)      | 146.08±0.10                             |
|                                                    | SZQ (C7)      | 341.64±0.21                             |
|                                                    | JDSJQ (C8)    | 98.55±0.10                              |
|                                                    | BXGZ (C9)     | 108.93±0.15                             |
|                                                    | ZSTCQ (C10)   | 122.64±0.07                             |
|                                                    | CTQGC (C11)   | 101.47±0.18                             |
|                                                    | SJXBC (C12)   | 10.16±0.05                              |
